# Supplementary material for: Using association rule mining to jointly detect clinical features and differentially expressed genes related to chronic inflammatory diseases
Source: PLoS One. 2020 Oct 2;15(10):e0240269. doi: 10.1371/journal.pone.0240269 (PMC7531780; doi:10.1371/journal.pone.0240269)
Supplement: S1 File — (CSV) [file pone.0240269.s001.csv]

Code	Sex	Group	Age	BMI	WHR	AC	FPG	INS	HbA1c	HOMA_IR	TC	HDL	LDL	TG	VP	GI	BOP	TNT	PPDi3mm	PPDi4_5mm	PPDi6mm	CALi2mm	CALi3_4mm	CALi5mm	SUPP	NDI	MNCF	MNF	FNB	N_HDL_C
p1	1	1	2	4	4	3	3	1	4	2	4	2	3	3	3	3	3	2	2	2	2	2	1	2	3	2	2	2	3	4
p3	1	1	2	3	4	3	3	1	4	2	3	2	2	3	3	3	3	1	2	2	2	1	2	3	2	3	1	1	1	3
p6	2	1	1	3	2	2	3	2	4	2	3	2	4	1	2	3	3	2	2	1	2	1	1	3	1	3	2	3	3	3
p7	1	1	1	5	4	3	3	1	4	2	4	2	3	3	3	3	3	2	2	2	1	1	1	3	2	2	2	2	3	5
p10	2	1	1	3	2	2	3	1	4	2	4	1	5	1	3	3	3	2	1	3	1	1	1	3	2	2	1	1	2	5
p12	1	1	2	3	4	3	3	1	4	2	4	2	4	3	3	3	3	1	3	2	1	1	2	2	1	2	1	1	2	4
p13	1	1	1	4	3	3	3	2	4	2	4	3	4	1	3	2	2	2	2	1	2	1	2	2	2	2	1	1	2	4
p16	2	1	1	3	4	2	3	1	4	2	2	1	2	3	1	2	3	2	1	1	2	1	1	3	3	3	1	1	2	3
p17	2	1	1	3	3	3	3	1	4	2	3	1	4	1	3	3	3	2	1	2	2	1	1	3	3	3	1	1	1	4
p18	2	1	1	2	2	1	3	1	4	2	4	2	4	1	3	3	3	1	3	2	1	1	2	2	2	3	2	2	2	3
p19	1	1	1	5	4	3	3	1	4	2	3	1	3	3	3	2	3	2	2	2	2	1	2	2	1	2	2	2	3	3
p22	1	1	2	3	4	2	3	1	4	1	4	2	4	3	3	3	3	2	2	2	2	1	2	2	2	1	1	2	1	5
p23	1	1	2	3	4	3	2	1	4	2	4	2	4	3	3	2	2	2	2	1	2	1	2	2	2	2	1	1	2	4
p25	1	1	1	5	4	3	3	1	4	2	3	2	2	3	3	3	3	2	2	2	2	1	2	3	1	3	1	1	2	3
p29	2	1	2	3	3	3	3	2	4	2	2	1	1	3	3	3	3	1	2	1	2	1	2	2	2	2	2	2	1	2
p33	2	1	2	3	3	2	3	1	4	2	3	2	3	2	3	2	3	2	3	1	1	1	2	2	3	3	1	1	1	4
p55	1	1	2	2	1	1	3	1	4	2	4	2	5	1	3	2	3	2	3	1	2	2	1	2	2	2	3	3	1	5
p56	1	1	2	5	4	3	3	1	4	2	2	1	2	3	3	3	3	1	3	2	1	1	2	3	1	1	3	3	1	2
p 59	1	1	1	2	4	3	3	1	4	1	4	3	4	1	3	3	3	2	2	1	2	1	1	3	2	1	2	2	1	3
p 60	2	1	1	5	3	3	3	1	4	2	2	1	1	3	3	3	3	2	3	2	1	1	3	1	2	3	2	2	1	1
p73	1	1	2	5	4	3	3	1	4	2	4	2	3	3	3	3	3	1	3	2	1	1	3	1	2	1	2	2	3	5
p75	2	1	2	4	3	3	3	1	4	2	4	2	4	3	3	2	3	2	3	1	1	1	3	1	2	3	2	2	1	4
p78	1	1	1	4	4	3	3	1	4	2	3	2	5	3	3	3	3	2	3	1	1	1	2	1	2	1	3	3	3	3
p79	1	1	1	3	4	3	3	1	4	2	4	2	5	3	3	3	3	2	2	2	1	1	2	2	2	2	2	3	3	5
p80	1	1	1	4	4	3	3	2	4	2	4	1	4	1	3	2	3	1	3	1	1	1	3	1	2	2	2	3	2	5
p84	1	1	2	3	4	3	3	2	4	2	4	2	4	1	3	3	3	2	2	2	1	1	3	2	2	3	3	3	3	4
p88	1	1	1	2	4	3	3	1	4	2	3	2	2	3	3	2	3	2	2	2	1	1	3	1	2	1	2	2	3	3
p92	2	1	1	5	4	3	3	1	4	2	3	2	3	3	3	3	3	1	1	2	2	1	2	3	1	1	1	1	3	4
p2	1	2	1	3	4	3	3	1	3	2	4	2	3	3	3	2	2	1	3	1	1	1	2	2	2	2	1	1	1	4
p4	1	2	1	5	4	3	2	2	3	2	3	2	2	3	3	2	3	1	3	2	1	1	3	1	2	2	1	1	1	3
p5	1	2	2	3	4	3	1	2	3	2	4	1	5	3	2	1	1	2	3	1	1	3	1	1	2	3	1	1	2	5
p8	1	2	2	4	4	3	3	1	3	2	3	1	2	3	3	3	2	2	3	1	1	2	3	1	2	1	2	2	1	4
p14	2	2	2	3	2	2	2	1	2	2	4	1	4	3	3	2	2	1	2	2	1	1	2	2	1	2	2	2	2	5
p15	1	2	2	5	4	3	3	1	3	2	4	2	3	3	3	1	2	1	3	1	1	1	2	2	1	1	1	1	1	4
p21	1	2	2	4	4	3	1	2	2	2	4	2	5	3	3	3	2	1	3	1	1	1	2	2	2	2	2	2	2	5
p30	2	2	2	4	3	3	2	2	1	2	4	2	4	3	3	1	2	1	3	1	1	1	2	2	2	3	2	2	2	5
p32	1	2	1	4	4	3	3	1	3	2	4	2	5	3	3	3	3	1	3	2	1	1	3	1	2	3	1	1	1	5
p37	1	2	1	4	4	3	2	1	2	2	4	2	4	1	3	3	3	1	1	1	2	1	2	3	2	3	3	3	3	4
p38	2	2	1	4	4	3	3	1	3	2	3	2	2	3	3	1	2	2	3	2	1	1	3	1	2	3	2	2	3	3
p49	1	2	2	4	4	3	3	1	3	2	4	2	4	2	3	2	3	2	3	1	1	1	3	1	2	2	3	3	3	5
p53	1	2	2	4	4	3	1	2	3	2	4	3	4	1	3	3	2	2	3	2	1	2	3	1	1	1	3	3	3	4
p54	1	2	1	5	4	3	2	1	3	1	2	2	1	3	3	3	2	2	2	2	1	1	2	2	2	1	3	3	1	1
p64	1	2	1	5	4	3	1	2	1	2	4	2	4	3	3	3	3	1	3	2	1	1	3	2	2	2	3	3	2	4
p65	2	2	2	4	4	3	3	1	2	2	4	3	4	3	3	3	3	1	3	1	1	1	3	2	2	2	2	3	3	5
p66	1	2	2	3	4	3	2	1	2	1	4	3	3	1	3	2	3	2	3	1	1	1	2	2	2	2	3	3	1	3
p68	1	2	2	3	4	3	3	1	3	2	2	1	1	3	3	3	3	1	2	2	1	1	1	3	2	3	3	3	2	2
p69	2	2	1	3	2	3	2	1	2	2	4	2	3	3	3	2	3	2	2	1	2	1	2	3	2	1	3	3	1	5
p70	2	2	1	3	2	3	2	1	3	2	2	1	2	3	2	1	2	2	3	1	1	2	2	1	1	1	3	3	1	2
p77	2	2	2	3	4	3	3	1	3	2	4	2	5	1	3	2	3	2	3	1	1	1	2	3	2	2	3	3	3	4
p85	2	2	1	2	1	1	1	1	2	1	4	2	4	1	3	3	3	1	3	2	1	1	3	1	2	2	2	3	1	4
p90	1	2	2	4	4	3	3	1	3	2	3	2	1	3	3	3	3	2	2	2	1	1	2	2	1	1	3	3	3	2
p91	1	2	2	4	4	3	3	1	1	2	2	1	2	3	3	3	3	1	1	2	1	1	2	3	1	1	2	2	1	2
p93	1	2	2	5	4	3	3	2	2	2	3	1	2	3	3	2	3	2	3	2	1	1	3	1	1	1	2	3	3	3
p94	2	2	2	3	4	2	2	1	3	2	2	2	1	3	3	2	2	2	2	2	1	1	3	2	1	1	2	3	3	2
p95	2	2	1	4	4	2	3	1	1	2	4	2	3	3	3	1	2	1	3	2	1	1	3	1	1	1	2	2	3	4
p96	1	2	1	5	4	3	3	1	3	2	2	2	1	3	3	2	3	2	3	2	1	1	2	1	1	1	2	3	2	2
p99	1	2	1	3	4	3	2	1	1	2	4	2	5	1	3	3	3	2	2	2	1	1	3	2	1	1	2	2	3	5
p20	1	3	2	3	4	3	1	1	2	1	4	2	4	2	3	3	3	2	2	3	1	1	3	1	1	2	1	1	1	5
p26	1	3	1	3	4	3	1	2	1	2	3	2	2	3	3	2	2	2	2	2	1	1	2	2	1	3	1	1	1	3
p27	1	3	1	3	4	3	1	1	1	2	4	2	4	2	2	1	1	2	3	1	1	3	1	1	1	2	2	2	1	4
p28	1	3	1	3	4	2	1	1	1	1	4	2	4	1	3	3	3	2	2	1	1	1	2	2	2	2	2	3	1	4
p31	1	3	2	3	4	3	1	1	1	2	4	2	4	1	3	2	2	2	3	1	1	2	3	1	1	3	2	2	2	4
p34	2	3	2	3	2	2	1	1	2	2	2	1	1	3	3	2	3	2	3	1	1	2	2	1	2	3	1	1	2	1
p35	2	3	1	5	2	3	1	1	2	1	3	2	4	1	3	2	2	2	3	1	1	1	2	2	2	3	1	2	3	3
p36	1	3	2	2	4	2	1	1	2	1	4	2	5	1	3	2	3	1	3	1	1	1	3	1	1	3	2	2	1	5
p39	2	3	2	4	4	3	1	1	2	1	4	2	4	2	3	1	2	2	3	1	1	2	2	1	1	1	1	1	2	4
p40	2	3	1	4	4	3	1	1	1	2	3	2	3	3	3	2	2	2	3	1	1	2	3	1	2	1	1	1	2	3
p41	2	3	1	4	3	3	1	1	2	2	2	2	1	3	3	2	2	2	3	1	1	2	2	1	1	3	1	1	3	2
p42	2	3	2	5	2	3	1	1	1	2	3	2	3	3	1	1	2	1	3	2	1	1	3	1	1	3	2	2	1	4
p44	1	3	2	4	3	3	1	1	2	2	4	2	5	3	3	2	3	2	3	2	1	1	3	1	1	3	2	2	2	5
p45	1	3	1	3	4	3	1	1	1	2	2	2	1	3	3	2	3	2	3	1	1	1	3	1	2	3	2	2	2	2
p46	1	3	1	4	2	3	1	1	1	1	4	3	5	1	3	3	3	1	2	2	1	1	2	3	2	3	2	2	1	5
p47	2	3	1	4	2	3	1	2	2	2	2	1	2	3	3	2	2	2	3	1	1	2	3	1	1	2	2	2	1	2
p48	2	3	1	3	2	1	1	1	1	1	4	2	5	2	3	2	3	2	3	1	1	1	3	1	2	3	3	3	2	5
p51	2	3	2	3	3	3	1	1	1	2	4	2	3	3	3	2	3	2	3	2	1	1	3	1	2	2	3	3	3	4
p57	1	3	2	3	4	3	1	1	2	2	4	2	4	2	3	3	3	2	2	2	1	1	2	2	2	1	2	3	1	4
p61	1	3	2	2	4	3	1	1	1	1	4	2	5	3	3	3	2	2	3	1	1	1	3	1	2	3	2	2	3	5
p67	1	3	2	2	4	3	1	1	1	2	2	2	2	3	3	2	3	2	3	2	1	1	3	1	2	2	3	3	2	2
p71	1	3	1	3	4	3	1	1	1	2	4	2	3	2	3	1	2	1	3	1	1	2	2	1	2	2	2	3	3	3
p72	1	3	2	2	3	3	1	1	2	1	4	3	3	1	3	2	3	1	2	3	1	1	3	2	2	2	3	3	3	3
p74	2	3	1	3	2	2	1	1	1	1	4	2	5	3	3	2	3	2	3	1	1	1	3	2	2	2	2	2	1	5
p82	2	3	2	5	4	3	1	2	2	2	4	2	3	3	3	1	2	1	3	1	1	1	3	1	2	1	2	2	3	4
p83	2	3	2	3	4	3	2	1	1	2	3	2	1	3	3	3	2	1	3	2	1	3	2	1	2	2	3	3	3	3
p87	2	3	1	3	2	1	1	1	1	1	3	1	3	3	3	1	3	2	3	1	1	1	3	1	1	1	2	2	2	3
p86	1	3	1	3	4	3	1	1	1	1	4	3	4	1	2	2	3	2	3	2	1	1	3	1	2	1	2	2	3	3
p89	1	3	2	2	3	1	1	1	2	1	4	3	4	1	3	2	3	2	2	2	1	1	2	2	1	1	2	3	3	3
PC1	2	4	1	3	2	2	1	1	1	1	2	2	1	1	2	2	2	2	3	1	1	1	3	1	1	1	2	2	2	1
PC2	1	4	1	4	4	3	1	1	2	1	2	2	2	1	3	2	3	2	3	2	1	1	3	1	1	1	1	1	1	1
PC3	2	4	1	3	4	3	1	1	2	1	2	2	2	1	3	3	3	2	3	2	1	1	3	1	2	2	1	1	2	2
PC4	1	4	1	4	4	3	1	1	1	1	2	3	1	1	3	1	2	2	3	1	1	1	3	1	2	1	2	2	3	1
PC5	1	4	1	3	4	3	1	1	1	1	1	2	1	1	3	3	3	2	2	2	1	1	3	1	2	3	1	1	1	1
PC6	1	4	2	2	4	3	1	1	1	1	2	2	2	1	2	2	3	2	3	1	1	2	2	1	1	2	1	1	2	2
PC7	1	4	1	2	4	1	1	1	1	1	2	3	2	1	3	2	2	1	3	2	1	1	3	1	1	1	1	1	1	1
PC8	1	4	2	2	3	1	1	1	1	1	2	2	2	1	3	2	3	2	3	1	1	1	3	1	1	3	1	1	1	1
PC9	1	4	1	3	3	3	1	1	2	1	2	3	1	1	3	2	2	2	3	2	1	1	3	2	1	3	1	1	1	1
PC10	1	4	1	3	2	3	1	1	2	1	2	1	2	1	2	2	3	2	2	2	1	1	3	2	2	1	1	1	1	1
PC11	2	4	1	3	4	3	1	1	1	2	2	1	1	2	3	3	3	1	1	3	1	1	2	3	2	1	1	1	2	1
PC12	1	4	1	3	4	3	1	1	1	1	2	2	2	1	3	2	3	2	2	2	1	1	3	2	2	1	2	2	1	2
PC13	1	4	2	3	2	2	1	1	1	1	2	2	1	1	3	2	3	2	3	2	1	1	3	2	1	1	2	2	1	1
PC15	1	4	1	4	4	3	1	1	1	2	2	1	2	1	2	2	2	2	2	2	1	1	3	2	1	3	1	1	1	2
PC16	1	4	1	2	4	1	1	1	1	1	1	2	1	1	3	2	2	2	3	2	1	1	3	1	1	2	1	1	1	1
PC17	1	4	1	2	3	1	1	1	1	1	1	2	1	1	2	2	3	2	2	2	1	1	3	2	1	1	2	2	3	1
PC18	2	4	1	2	2	2	1	1	1	2	2	1	2	3	3	3	2	2	2	3	1	1	3	1	2	1	2	2	2	2
PC19	2	4	1	5	4	3	1	2	1	2	2	2	1	1	3	3	3	2	2	3	1	1	3	1	1	1	2	2	2	1
PC20	1	4	1	4	3	3	1	1	1	2	2	2	2	1	2	2	3	2	2	3	1	1	3	2	2	1	1	1	1	2
PC21	2	4	1	3	3	3	2	1	1	2	2	1	2	2	3	2	3	2	2	2	1	1	2	3	2	1	1	1	2	2
PC22	2	4	2	5	3	3	1	1	1	2	2	2	2	1	2	1	2	1	3	2	1	1	3	1	1	1	1	1	1	2
PC24	1	4	2	2	3	2	1	1	1	1	2	3	1	1	3	3	3	2	2	3	1	1	2	2	1	1	1	1	1	1
PC25	1	4	1	3	3	3	1	1	1	2	2	2	2	1	2	2	2	2	2	2	1	1	3	1	2	1	1	1	1	2
PC26	2	4	1	5	4	3	1	2	1	2	2	1	2	1	3	2	2	1	3	2	1	1	3	2	1	1	1	1	3	2
PC27	1	4	1	2	4	3	1	1	1	1	2	2	1	1	2	1	2	2	2	3	1	1	3	1	2	1	1	2	1	1
PC28	2	4	1	2	1	1	1	1	1	1	2	1	2	1	2	2	3	2	2	2	1	1	3	2	2	2	1	1	1	2
PC29	2	4	1	3	1	1	1	1	1	1	2	2	3	1	3	1	3	2	2	2	1	1	3	1	2	1	1	1	1	2
PC30	2	4	1	2	2	2	1	1	1	1	2	2	2	1	3	3	2	2	2	2	1	1	3	2	2	1	1	1	2	1
PC32	2	4	1	2	2	1	1	1	1	1	2	2	1	1	2	1	2	2	3	2	1	1	3	1	1	1	2	2	1	1
Gr1	1	5	1	2	3	1	1	1	1	1	2	3	1	1	1	1	1	2	3	1	1	3	2	1	1	1	1	1	1	1
Gr2	1	5	1	2	3	3	1	1	2	1	2	2	2	1	1	1	1	2	3	1	1	3	2	1	1	2	1	1	1	2
Gr3	2	5	1	2	1	1	1	1	1	1	1	1	1	1	1	1	1	2	3	1	1	3	2	1	1	1	1	1	1	1
Gr4	1	5	1	2	1	1	1	1	1	1	2	2	2	1	1	1	1	2	3	1	1	3	1	1	1	1	1	1	1	1
Gr5	2	5	1	2	1	1	1	1	1	1	2	2	3	1	1	1	1	2	3	1	1	2	3	1	1	2	1	1	1	2
Gr6	2	5	1	2	3	1	1	1	1	1	2	2	2	1	1	1	1	2	3	1	1	3	2	1	1	2	1	1	1	2
Gr7	1	5	1	2	2	2	1	1	1	1	3	3	2	1	1	1	1	2	3	1	1	3	2	1	1	1	1	1	1	2
Gr8	1	5	1	2	2	1	1	1	1	1	3	3	2	1	1	1	1	2	3	1	1	2	3	1	1	1	1	1	1	2
Gr9	2	5	1	2	1	1	1	1	1	1	3	3	2	1	1	1	1	2	3	1	1	3	2	1	1	2	1	1	1	2
Gr10	1	5	1	2	2	2	1	1	1	1	2	2	2	1	1	1	1	2	3	1	1	2	3	1	1	1	1	1	1	2
Gr11	1	5	1	2	1	1	1	1	1	1	1	2	1	1	1	1	1	2	3	1	1	3	1	1	1	2	1	1	1	1
Gr12	2	5	1	3	1	2	1	1	1	1	2	2	2	1	1	1	1	2	3	1	1	3	1	1	1	2	1	1	1	1
Gr13	1	5	1	2	2	2	1	1	1	2	2	2	1	1	1	1	1	2	3	1	1	2	3	1	1	2	1	1	1	1
Gr15	1	5	1	4	2	3	1	1	1	1	3	2	3	1	1	1	1	2	3	1	1	3	2	1	1	1	1	1	1	3
Gr16	2	5	1	3	2	2	1	1	1	1	3	1	3	1	1	1	1	2	3	1	1	3	2	1	1	1	1	2	1	3
Gr17	1	5	1	2	2	2	1	1	1	1	2	2	3	1	1	1	1	2	3	1	1	3	2	1	1	2	1	1	1	2
Gr18	1	5	1	4	2	3	1	1	1	2	2	1	2	1	1	1	1	2	3	1	1	3	2	1	1	2	1	1	1	2
Gr19	1	5	1	2	3	2	1	1	2	2	3	2	3	1	1	1	1	2	3	1	1	3	1	1	1	1	1	1	1	3
Gr20	1	5	1	3	3	3	1	1	1	1	2	2	1	1	1	1	1	2	3	1	1	3	1	1	1	1	1	1	1	1
Gr21	1	5	1	2	2	1	1	1	1	1	2	2	2	1	1	1	1	2	3	1	1	3	1	1	1	1	1	1	1	1
Gr22	2	5	1	2	2	2	1	1	1	1	2	1	1	1	1	1	1	2	3	1	1	3	2	1	1	1	1	1	1	1
Gr23	2	5	1	2	1	1	1	1	1	1	3	2	3	1	1	1	1	2	3	1	1	3	2	1	1	1	1	1	1	2
Gr24	1	5	1	4	4	3	1	1	1	2	2	2	1	1	1	1	1	1	3	1	1	3	1	1	1	1	1	1	1	1
Gr25	1	5	1	3	2	3	1	1	1	1	2	2	2	1	1	1	1	2	3	1	1	3	2	1	1	1	1	1	1	1
Gr27	1	5	1	3	2	3	1	1	1	1	2	2	2	1	1	1	1	2	3	1	1	3	1	1	1	1	1	1	1	2
Gr28	2	5	1	3	3	3	1	1	2	1	2	2	2	1	1	1	1	2	3	1	1	3	2	1	1	1	1	1	1	1
Gr29	2	5	1	3	2	3	1	1	2	1	2	2	2	1	1	1	1	2	3	1	1	3	1	1	1	1	1	1	1	2
Gr30	2	5	1	2	2	1	1	1	1	1	1	2	1	1	1	1	1	2	3	1	1	3	2	1	1	1	1	1	1	1
